# Supplementary material for: Mechanism of the Exchange Reaction in HRAS from Multiscale Modeling
Source: PubMed Central journal article supplement (PMC4182752; doi:10.1371/journal.pone.0108846), 2014-10-01
Supplement: pone.0108846.s016.pdf [file pone.0108846.s016.pdf]

Table S1: List of all-atom simulations performed.

| PDB ID/Name           | Temperature (K) | Equilibration (ns) | Production (ns) | Simulation Time (ns) |
|-----------------------|-----------------|--------------------|-----------------|----------------------|
| 4Q21                  | 300             | 1                  | 99              | 100                  |
| 4Q21                  | 360             | 1                  | 99              | 100                  |
| 4Q21                  | 400             | 1                  | 99              | 100                  |
| 5P21                  | 300             | 1                  | 99              | 100                  |
| 5P21                  | 360             | 1                  | 99              | 100                  |
| 5P21                  | 400             | 1                  | 99              | 100                  |
| 3RSO                  | 300             | 1                  | 99              | 100                  |
| 3RSO                  | 360             | 1                  | 99              | 100                  |
| 4Q21E37A              | 360             | 1                  | 99              | 100                  |
| 4Q21S39A              | 360             | 1                  | 99              | 100                  |
| 4Q21-OpenSI-Run1      | 360             | 1                  | 99              | 100                  |
| 4Q21-OpenSI-Run2      | 360             | 1                  | 174             | 175                  |
| 4Q21-OpenSI-Run3      | 360             | 1                  | 253             | 254                  |
| 4Q21-OpenSI-S17AD57A  | 360             | 1                  | 180             | 181                  |
| 4Q21-OpenSI-SMD-CMD   | 360             | 1                  | 104             | 105                  |
| 4Q21-OpenSI-D119A     | 360             | 1                  | 193             | 194                  |
| 4Q21-D119A            | 360             | 1                  | 100             | 101                  |
| 4Q21-OpenSI-Y32A-Run1 | 360             | 1                  | 284             | 285                  |
| 4Q21-OpenSI-Y32A-Run2 | 360             | 1                  | 174             | 175                  |
| 4Q21-OpenSI-Y32F-Run1 | 360             | 1                  | 99              | 100                  |
| 4Q21-OpenSI-Y32F-Run2 | 360             | 1                  | 99              | 100                  |
| 4Q21-OpenSI-I21S-Run1 | 360             | 1                  | 125             | 126                  |
| 4Q21-OpenSI-I21S-Run2 | 360             | 1                  | 125             | 126                  |
