# Supplementary material for: Mechanism of the Exchange Reaction in HRAS from Multiscale Modeling
Source: PubMed Central journal article supplement (PMC4182752; doi:10.1371/journal.pone.0108846), 2014-10-01
Supplement: pone.0108846.s017.pdf [file pone.0108846.s017.pdf]

Table S2: PDB id of 25 structures added to the 46 structure dataset used for PCA.

| PDB ID | PDB ID | PDB ID | PDB ID | PDB ID |
|--------|--------|--------|--------|--------|
| 2RGA   | 2RGB   | 2RGC   | 2RGD   | 3K8Y   |
| 3LBH   | 3LBI   | 3LBN   | 3RRY   | 3RRZ   |
| 3RS0   | 3RS2   | 3RS3   | 3RS5   | 3RSO   |
| 3V4F   | 4DLR   | 4DLS   | 4DLT   | 4DLU   |
| 4DLV   | 4DLW   | 4DLX   | 4DLY   | 4DLZ   |
