# Supplementary material for: Mechanism of the Exchange Reaction in HRAS from Multiscale Modeling
Source: PubMed Central journal article supplement (PMC4182752; doi:10.1371/journal.pone.0108846), 2014-10-01
Supplement: pone.0108846.s018.pdf [file pone.0108846.s018.pdf]

Table S3: List of representative sidechain atoms of hydrophobic and charged residues used for contact analysis.

| Residue Name | Representative Atom |
|--------------|---------------------|
| ALA          | CB                  |
| ARG          | CZ                  |
| ASP          | CG                  |
| GLU          | CD                  |
| ILE          | CG1                 |
| LEU          | CG                  |
| LYS          | CE                  |
| MET          | SD                  |
| PHE          | CG                  |
| TYR          | CG                  |
| VAL          | CB                  |
